# Supplementary material for: Knockdown of PHOX2B in the retrotrapezoid nucleus reduces the central CO2 chemoreflex in rats
Source: eLife. 2024 May 10;13:RP94653. doi: 10.7554/eLife.94653 (PMC11087052; doi:10.7554/eLife.94653)
Supplement: Figure 1—source data 1. [file elife-94653-fig1-data1.xlsx]

## Sheet: Fig 1
		* replicate animals in columns
frequency
	Baseline
	NT-shRNA																	Phox2b shRNA																	Naive
	#1	#2	#3	#4	#5	#6	#7	#8	#9	#10	#11	#12	#13	#14	#15	#16	#17	#1	#2	#3	#4	#5	#6	#7	#8	#9	#10	#11	#12	#13	#14	#15	#16	#17	#1	#2	#3	#4	#5	#6	#7	#8
Air	113.12	101.75	92.05	103.57	125.1	120.86	111.16	119.8	110.7	95.16	106.88	114.38	104.94	108.5	112.03	111.84	117.05	111.98	114.67	120.71	101.1	120.87	104.64	88.7	109.68	107.84	103.18	101.39	113.58	122.96	114.27	101.93	103.21	96.09	112.68	100.51	97.65	104.29	108.8	99.45	102.46	112.31
5% C02	144.77	150.87	119.2	148.74	176.12	176.39	139.85	161.81	139.04	141.36	182.8	157.59	167.34	162.09	156.72	153.26	149.79	150.45	148.01	174.35	175.78	163.51	128.92	114.63	113.44	133.79	140.22	131.24	147.39	156.27	162.62	170.46	166.4	168.38	167.38	146.52	141.45	150.64	168.05	187.25	184.13	148.1
7.2% CO2	139.78	158.81	140.08	148.19	177.39	177.41	141.41	140.08	152.07	177.14	200.91	179.17	172.77	169.77	169.39	166.12	156.9	203.41	151.26	177.88	169.57	172.43	137.65	131.7	114.42	145.33	135.3	128.73	166.95	160.04	177.29	172.2	173.69	172.56	167.25	170.06	149.86	164.65	174.14	191.33	178.92	157.08
	NT-shRNA (Post 2 Weeks)
	#1	#2	#3	#4	#5	#6	#7	#8	#9	#10	#11	#12	#13	#14	#15	#16	#17
Air	121.19	102.36	100.16	97.61	111.17	109.98	94.41	109.32	105.04	98.27	101.85	116.56	98.3	103.22	110.01	104.46	100.35
5% C02	147.16	139.95	130.14	138.48	158.86	146.69	144.49	142.42	142.96	147.55	142.93	161.47	162.2	146.05	139.25	128.66	126.29
7.2% CO2	158.47	148.12	143.5	152.09	165.61	160.91	143.75	166.87	150.95	148.44	144.55	176.9	169.6	156.9	156.5	143.29	138.81
	Phox2b -shRNA (Post 2 Weeks)
																		#1	#2	#3	#4	#5	#6	#7	#8	#9	#10	#11	#12	#13	#14	#15	#16	#17
Air																		99.92	114.65	97.36	89.13	93.12	72.69	84.55	96.94	97.61	99.19	123.78	97.7	101.33	98.4	124.86	107.96	109.72
5% C02																		127.41	140.54	156.88	130.11	121.59	103.42	110.88	111.19	116.41	131.95	124.83	153.39	149.47	156.39	159.09	159.63	147.69
7.2% CO2																		132.48	156.71	169.86	144.31	141.09	114.95	104.77	117.3	127.6	153.92	147.5	161.84	168.27	154.58	163.69	167.02	166.12
	Naive (Post, 2 Weeks)
																																			#1	#2	#3	#4	#5	#6	#7	#8
Air																																			110.45	104.61	93.94	99.31	105.6	103.06	110.77	85.66
5% C02																																			160.9	142.48	142.01	140.23	148.94	160.52	151	139.46
7.2% CO2																																			169.04	151.71	141.41	134.29	152.01	158.1	163.67	147.91
Vt
	Baseline
	NT-shRNA																	Phox2b shRNA																	Naive
	#1	#2	#3	#4	#5	#6	#7	#8	#9	#10	#11	#12	#13	#14	#15	#16	#17	#1	#2	#3	#4	#5	#6	#7	#8	#9	#10	#11	#12	#13	#14	#15	#16	#17	#1	#2	#3	#4	#5	#6	#7	#8
Air	5.31	5.61	5.99	6.37	5.05	5.1	5.51	5.11	4.93	5.79	6.13	5.03	5.55	5.85	5.64	4.53	5.16	5.77	7.85	4.81	4.72	5.41	5.45	5.68	6.46	4.45	6.62	5.22	5.57	5.34	5.49	6.78	6.74	6.62	5.14	6.12	6.68	5.8	6.33	5.48	6.16	5.46
5% CO2	7.6	7.4	7.96	8.28	6.34	7.31	6.25	8.82	6.92	7.47	8.28	7	7.76	7.61	8.22	7.51	6.65	9.25	7.92	7.28	8.52	8.29	7.2	7.32	10.17	5.85	7.59	7.26	6.83	6.91	6.08	8.63	9.2	8.31	6.75	7.99	9.62	7.04	8.34	7.04	7.41	7.83
7% CO2	8.62	8.45	10.72	10.42	7.56	8.43	7.8	12.28	9.23	8.09	9.9	8.43	9.03	9.45	10.55	8.81	8.64	11.78	10.43	8.77	8.49	10.69	9.53	8.63	8.87	7.15	8.48	8.72	7.8	10.28	9.4	11.07	12.24	11.32	8.43	8.43	10.78	10.45	9.83	7.55	8.54	9.4
	NT-shRNA (Post, 2 Weeks)
	#1	#2	#3	#4	#5	#6	#7	#8	#9	#10	#11	#12	#13	#14	#15	#16	#17
Air	4.61	5.32	4.86	4.5	5.18	5.33	4.63	5.35	5.43	6.53	7.09	5.28	5.64	5.84	5.62	4.56	5.53
5% CO2	6.66	6.57	6.77	7.01	6.22	6.47	6.15	7.83	8.11	8.41	9.32	8.14	7.24	7.92	7.63	7.65	7.39
7% CO2	8.24	7.42	9.51	8.58	7.59	8.63	8.87	9.6	8.01	8.91	11.14	7.35	10.66	9.83	8.73	9.35	8.96
	Phox2b shRNA (Post, 2 Weeks)
																		#1	#2	#3	#4	#5	#6	#7	#8	#9	#10	#11	#12	#13	#14	#15	#16	#17
Air																		6.11	5.72	6.11	4.41	6.43	5.64	4.73	5.34	4.73	5.74	4.3	4.88	5	5.77	7.12	6.96	5.14
5% CO2																		9.74	6.72	8.08	6.35	6.97	7.23	6.58	6.51	6.87	7.22	6.53	6.45	7.51	7.8	9.31	8.52	6.61
7% CO2																		9.2	8.63	9.03	7.84	8.65	8.79	7.08	7.8	7.02	8.33	7.56	7.81	9.19	8.79	10.37	9.19	9.67
	Naive (Post, 2 Weeks)
																																			#1	#2	#3	#4	#5	#6	#7	#8
Air																																			6.1	5.6	7.88	6.51	5.3	5.02	5.76	6.27
5% CO2																																			8.94	7.74	10.06	9.13	7.95	6.79	7.74	8.26
7% CO2																																			10.96	8.06	9.86	9.69	11.04	8.05	8.71	10.24
VE_ALLO
	Baseline
	NT-shRNA																	Phox2b shRNA																	Naive
	#1	#2	#3	#4	#5	#6	#7	#8	#9	#10	#11	#12	#13	#14	#15	#16	#17	#1	#2	#3	#4	#5	#6	#7	#8	#9	#10	#11	#12	#13	#14	#15	#16	#17	#1	#2	#3	#4	#5	#6	#7	#8
Air	33.58	32.31	31.33	38.71	34.14	34.34	33.92	31.15	28.74	28.93	36.28	31.28	32.79	35.8	36.25	28.76	35.34	37.53	27.69	32.81	47.33	32.66	41.76	29.74	36.61	31.03	41.81	32.68	39.65	41.37	33.4	33.2	32.64	30.66	32.5	34.01	34.24	32.71	33.81	28.48	33.78	38.76
5% CO2	61.52	63.21	53.88	72.28	60.34	71.82	48.34	72.73	50.64	55.48	84.41	60.02	73.05	69.59	73.97	65.39	58.27	77.78	86.89	71.73	61.67	70.34	68.01	48.59	59.6	51.64	65.13	58.9	63.04	68.07	52.64	70.65	71.85	67.54	63.31	64.68	71.45	57.28	68.83	68.86	72.91	73.31
7.2% CO2	67.35	75.95	85.29	90.69	72.52	83.34	61.04	88.03	78.71	75.24	110.98	82.17	87.77	90.54	102.55	83.16	79.36	105.86	83.53	88.15	83.04	121.05	59.84	64.43	84.27	69.98	70.21	69.33	81.66	103.8	88.81	91.54	99.75	94.22	79.02	79.18	84.87	92.98	84.06	75.45	81.72	93.38
	NT-shRNA (Post 2 Weeks)
	#1	#2	#3	#4	#5	#6	#7	#8	#9	#10	#11	#12	#13	#14	#15	#16	#17
Air	34.45	34.21	31.87	30.53	36.06	36.38	29.4	34.52	34.83	37.37	42.13	37.66	34.31	37.81	38.01	30.28	35.76
5% CO2	60.47	57.74	57.65	67.49	61.86	58.88	47.38	65.79	70.81	72.34	77.79	80.51	72.69	72.52	65.31	62.64	60.06
7.2% CO2	80.58	69.06	89.29	90.73	78.62	86.13	52.54	94.48	73.85	77.05	104.55	79.57	111.88	96.64	84.01	85.19	80.07
	Phox2b shRNA (Post 2 Weeks)
																		#1	#2	#3	#4	#5	#6	#7	#8	#9	#10	#11	#12	#13	#14	#15	#16	#17
Air																		39.28	25.53	36.33	39.38	35.2	34.05	30.96	27.59	26.22	38.58	29.7	33.4	34.78	37.2	56.27	46.63	34.45
5% CO2																		55.63	53.68	77.38	56.72	71.57	47.63	53.61	50.28	47.86	64.47	45.48	69.43	77.12	79.88	93.8	84.35	59.59
7.2% CO2																		80.12	73.55	93.7	81.19	70.3	60.19	60.04	67.98	48.67	86.78	62.2	88.61	106.25	88.95	107.43	95.19	98.06
	Naive (Post, 2 Weeks)
																																			#1	#2	#3	#4	#5	#6	#7	#8
Air																																			41.32	34.96	42.91	42.52	33.61	33.54	43.39	35
5% CO2																																			88.16	65.86	82.74	84.24	71.08	70.65	79.42	75.1
7.2% CO2																																			113.54	73.04	80.79	85.54	100.82	82.54	96.87	98.65
VO2
	Baseline
	NT-shRNA																	Phox2b shRNA																	Naive
	#1	#2	#3	#4	#5	#6	#7	#8	#9	#10	#11	#12	#13	#14	#15	#16	#17	#1	#2	#3	#4	#5	#6	#7	#8	#9	#10	#11	#12	#13	#14	#15	#16	#17	#1	#2	#3	#4	#5	#6	#7	#8
Air	13.68	10.17	13.55	14.24	11.98	12.44	12.9119	14.7	13.31	13.1221	13.55	10.9628	12.2456	11.16	10.42	10.2518	11.11	11.34	12.67	14.5	11.83	10.62	11.76	11.2689	11.988	13.8629	10.704	13.1563	12.8727	10.6832	12.49	11.735	12.7708	12.0268	14.4472	16.55	12.67	10.23	11.89	12.4	10.03	14.65
5% CO2	12.8	13.2	11.31	15.98	12.21	14.6	13.1984	13.63	11.83	10.6031	13.4529	12.87	13.06	13.0941	11.01	14.72	10.1872	11.59	14.31	13.04	16.23	14.06	12.95	10.7776	12.5451	12.429	9.51173	13.7408	15.3972	11.7771	11.2686	10.1646	13.5515	12.4258	13.063	14.8	11.95	15.65	11.08	14.32	15.28	13.63
7.2% CO2	12.99	9.9	11.29	12.36	10.96	12.06	12.7531	9.24	11.79	12.3073	10.3711	10.61	16.28	15.0725	10.5225	10.78	11.2363	10.8	17.68	12.47	11.5	10.09	10.66	10.1936	12.2882	12.4787	9.27426	12.135	11.7952	10.8351	11.2858	9.63297	9.38069	13.7176	9.7841	16.38	10.47	14.7	13.33	9.11	11.13	12.2
	NT-shRNAPost 2 weeks
	#1	#2	#3	#4	#5	#6	#7	#8	#9	#10	#11	#12	#13	#14	#15	#16	#17
Air	11.7439	12.8506	11.4121	10.3052	12.5106	11.4582	11.3467	12.4261	10.717	10.3563	11.03	10.7851	11.3649	11.1941	10.89	12.37	10.5273
5% CO2	10.7068	13.9022	11.4308	15.3267	13.5963	9.20204	13.1856	11.5904	8.3362	10.2567	12.0419	11.39	11.1031	12.74	9.29	12.68	11.8893
7.2% CO2	9.77856	9.59235	11.9636	10.7335	13.0104	14.3424	14.8799	10.4937	11.3858	10.9936	10.3934	12.3	12.6925	16.49	9.80836	12.31	10.4085
	Phox2b-shRNA Post 2 weeks
																		#1	#2	#3	#4	#5	#6	#7	#8	#9	#10	#11	#12	#13	#14	#15	#16	#17
Air																		13.04	8.49	17.79	12.21	11.05	14.62	10.2429	12.1177	13.5189	11.1991	11.3662	11.5346	12.764	13.7889	13.8944	14.4683	12.5842
5% CO2																		13.1	12.92	15.45	12.06	9.26	12	11.6515	15.0574	9.38438	11.0815	10.4886	9.62396	10.8546	13.7918	10.4818	10.7869	12.4989
7.2% CO2																		11.76	13.37	16.42	10.66	7.97	13.65	9.80032	13.2971	9.04504	9.40686	11.7937	11.1685	13.6849	13.3025	11.5363	11.1904	13.1026
	Naive Post 2 weeks
																																			#1	#2	#3	#4	#5	#6	#7	#8
Air																																			12.114	14.7226	13.0735	11.2313	10.6045	13.7445	14.5602	13.4512
5% CO2																																			10.8417	11.5221	8.93978	12.6908	10.2132	15.801	13.9984	14.8918
7.2% CO2																																			12.3432	8.80732	13.2399	11.5965	10.3522	11.7965	14.9754	13.3121
VE/VO2_ALLO
	Baseline
	NT-shRNA																	Phox2b shRNA																	Naive
	#1	#2	#3	#4	#5	#6	#7	#8	#9	#10	#11	#12	#13	#14	#15	#16	#17	#1	#2	#3	#4	#5	#6	#7	#8	#9	#10	#11	#12	#13	#14	#15	#16	#17	#1	#2	#3	#4	#5	#6	#7	#8
Air	2.48	2.95	2.56	3.47	3.28	3.35	3.05	2.28	2.82	2.13	2.55	2.61	2.64	2.77	2.47	2.16	2.69	2.9	3.95	3.01	2.78	2.49	2.15	3.51	2.93	2.64	3.27	2.72	3.5	3.27	2.3	2.81	3.07	2.61	2.25	2.06	2.7	3.2	2.84	2.3	3.37	2.65
5% CO2	4.57	4.91	4.13	5.52	5.48	4.88	4.74	5.68	3.83	4.9	5.28	4.92	5	5.27	5.43	5.53	5.5	6.53	4.92	5.47	5.11	5.22	5.64	6.6	5.29	5.08	4.81	4.74	5.44	4.76	4.04	4.35	5.11	5.21	4.85	4.37	5.98	3.66	6.21	4.81	4.77	5.38
7.2% CO2	6.49	7.16	5.24	6.02	6.89	7.73	5.43	6.78	7.95	6.66	8.98	7.5	7.28	7.1	11.1	7.06	6.45	11.87	6.76	4.8	6.95	7.26	7.08	9.77	7.47	7.26	7.48	5.05	7.56	5.87	7.12	7.96	9.88	8.84	8.08	4.83	8.1	6.33	6.31	8.28	7.34	7.65
	NT-shRNA Post 2 weeks
	#1	#2	#3	#4	#5	#6	#7	#8	#9	#10	#11	#12	#13	#14	#15	#16	#17
Air	3.12	3.17	2.8	2.73	3.31	2.94	2.79	2.94	2.71	3.27	4.09	3.01	2.99	3.33	3.06	2.83	3.45
5% CO2	5.02	5.07	5.19	5.3	6.66	4.64	3.98	6.14	5.09	6.33	5.08	5.92	7.9	5.5	5.63	7.51	5.86
7.2% CO2	7.75	5.61	7.04	5.5	8.02	7	5.05	9.66	7.7	6.44	9.74	6.12	7.8	6.49	8.01	7.48	7.28
	Phox2b-shRNA Post 2 weeks
																		#1	#2	#3	#4	#5	#6	#7	#8	#9	#10	#11	#12	#13	#14	#15	#16	#17
Air																		3.44	3.25	2.52	2.76	3.2	2.21	3.08	2	1.89	2.67	2.36	2.56	4.1	2.09	4.61	4.22	2.36
5% CO2																		6.14	3.77	5.07	4.84	7.38	5.58	5.12	3.65	4.57	5.98	3.64	5.3	5.97	5.17	7.78	9.11	4.97
7.2% CO2																		7.17	6.11	6.65	6.38	7.94	6.59	5.85	5.11	4.22	7.76	4.75	7.53	7.94	5.42	10.08	11.95	7.19
	Naive Post 2 weeks
																																			#1	#2	#3	#4	#5	#6	#7	#8
Air																																			3.41	2.37	3.28	3.79	3.17	2.44	2.98	2.6
5% CO2																																			8.13	5.72	9.26	6.64	6.96	4.47	5.67	5.04
7.2% CO2																																			9.2	8.29	6.1	7.38	9.74	7	6.47	7.41
HCVR
	Baseline
	NT-shRNA																	Phox2b shRNA																	Naive
	#1	#2	#3	#4	#5	#6	#7	#8	#9	#10	#11	#12	#13	#14	#15	#16	#17	#1	#2	#3	#4	#5	#6	#7	#8	#9	#10	#11	#12	#13	#14	#15	#16	#17	#1	#2	#3	#4	#5	#6	#7	#8
5% CO2	27.94	30.9	22.55	33.57	26.19	37.48	14.42	41.58	21.9	26.56	48.13	28.74	40.27	33.79	37.72	36.63	22.93	40.25	59.2	38.93	14.34	37.69	26.25	18.85	22.99	20.61	23.31	26.22	23.39	26.69	19.24	37.46	39.21	36.87	30.8	30.67	37.2	24.57	35.02	40.38	39.13	34.55
7.2% CO2	33.77	43.64	53.96	51.98	38.38	49	27.12	56.88	49.97	46.31	74.7	50.88	54.98	54.74	66.3	54.39	44.02	68.32	55.84	55.34	35.71	88.39	18.09	34.69	47.66	38.95	28.4	36.65	42	62.43	55.41	58.34	67.11	63.56	46.51	45.17	50.63	60.27	50.25	46.97	47.94	54.62
	NT-shRNA (Post 2 Weeks)
	#1	#2	#3	#4	#5	#6	#7	#8	#9	#10	#11	#12	#13	#14	#15	#16	#17
5% CO2	26.02	23.52	25.78	36.97	25.8	22.51	17.98	31.27	35.98	34.96	35.66	42.84	38.38	34.71	27.29	32.36	24.3
7.2% CO2	46.13	34.85	57.42	60.21	42.56	49.75	23.14	59.97	39.03	39.67	62.42	41.9	77.57	58.84	46	54.92	44.31
	Phox2b shRNA (Post 2 Weeks)
																		#1	#2	#3	#4	#5	#6	#7	#8	#9	#10	#11	#12	#13	#14	#15	#16	#17
5% CO2																		16.35	28.15	41.04	17.34	36.37	13.58	22.65	22.69	21.64	25.89	15.78	36.03	42.34	42.68	37.53	37.72	25.14
7.2% CO2																		40.84	48.02	57.36	41.81	35.1	26.14	29.09	40.39	22.45	48.21	32.5	55.2	71.47	51.75	51.16	48.55	63.61
	Naive (Post, 2 Weeks)
																																			#1	#2	#3	#4	#5	#6	#7	#8
5% CO2																																			46.84	30.89	39.83	41.72	37.47	37.11	36.02	40.1
7.2% CO2																																			72.22	38.07	37.88	43.02	67.21	49	53.48	63.64

## Sheet: Fig 1. Supplement 1
Fig1_ supplementary 1
VE_ALLO
	* replicate animals in columns
animal	1#	2#	3#	4#	5#	6#			7#	8#	9#	10#	11#	12#	13#	14#			1#	2#	3#	4#	5#	6#			7#	8#	9#	10#	11#	12#	13#	14#
Gas Mix	NT-shRNA (Pre)								Phox2b shRNA (Pre)										NT-shRNA(Post, 4 Weeks)								Phox2b shRNA (Post, 4 Weeks)
Air	36.16	27.86	37.41	32.55	33.34	29.38			32.9	41.1	29.44	25.31	39.01	36.68	30.55	31.57			32.15	30.42	35.8159	34.78	27.74	28.05			34.43	40.79	35.45	34.8	36.05	34.37	28.1	30.05
5% CO2	71.39	62.67	72.74	56.91	72.68	54.58			61.96	63.95	58.82	67.24	71.44	63.14	60.93	59.85			51.18	47.04	65.3358	49.34	47	45.27			47.32	50.71	58.21	40.48	82.25	51.92	60.9	43.96
7% CO2	82.99	77.93	87.56	84.95	95.17	82.6			76.29	74.82	80.77	86.29	88.35	88.03	83.73	100.23			82.84	54.77	71.9116	61.19	62.34	68.56			59.18	52.81	68.95	55.72	90.23	67.8	60.94	62.14
Air	30.07	28.2	39.26	31.94	32.76	32.92			33.08	34.91	34.36	32.41	40.72	33.44	32.1	31.44			34.88	31.1	41.5355	25.33	29.115	29.96			31.76	38.69	29.05	33.17	32.49	29.06	30.87	32.82
10% O2	71.2	59	82.38	65.65	59.6	57.89			51.36	72.89	73.71	72.15	91.84	71.99	48.69	70.58			65.54	51.69	82.8056	66.05	62.3848	63.74			80.32	94.92	58.95	67.44	113.18	70.14	67.63	71.92
CRR	* replicate animals in columns
	*CRR = convective requirement ratio
animal	1#	2#	3#	4#	5#	6#			1#	2#	3#	4#	5#	6#			7#	8#	9#	10#	11#	12#	13#	14#			7#	8#	9#	10#	11#	12#	13#	14#
Gas Mix	NT-shRNA (Pre)								NT-shRNA (Post, 4 Weeks)								Phox2b shRNA (Pre)										Phox2b shRNA (Post, 4 Weeks)
Air	2.65985	1.93083	3.15	2.09057	2.464	2.25752			3.44	2.53	2.39	3.03	2.53	1.94			2.75594	3.98591	3.09223	4.38237	2.88874	2.73	3.13898	2.59385			2.8	4.06	1.79	2.41	3.08	1.87	2.36	2.67
5% CO2	4.71607	3.85797	4.91749	3.87344	4.73442	3.56502			5.29	3.74	4.52	3.71	4.62	3.73			5.56085	4.46437	4.16457	5.62031	4.9833	4.602	5.11228	4.04666			4.16	4.02	3.71	3.25	5.11	3.78	5.16	3.83
7% CO2	6.14503	5.18893	7.57556	5.71805	8.30468	5.03449			5.66	3.09	4.93	4.66	5.73	4.33			5.81914	5.76477	5.59441	7.1274	7.39749	6.85	6.56895	6.07618			4.33	5.65	5.46	4.66	5.01	4.69	6.76	5.6
Air	2.33099	2.12436	3.64	2.52021	2.53838	2.58			3.38	2.41	2.75	1.99	2.61	1.99			4.27582	3.55132	3.92915	2.74308	2.93319	2.73	2.25697	2.13574			3.01	4.69	1.66	2.65	2.42	1.59	3.08	2.72
10% O2	6.30181	4.42034	7.55282	5.37104	5.62094	3.74			6.42	4.51	4.9	4.45	5.26	4.17			4.58053	5.86913	7.57526	8.74011	7.82076	6.94635	5.77893	5.62479			8.54	9.35	3.9	4.55	11	7.42	7.34	4.75
Cell Counts
	Nmb+/PHOX2B-			Nmb+/PHOX2B+
Naive 1	124		345
Naive 2	46		316
NT-shRNA
1#	43		112
2#	25		164
3#	204		68
4#	124		54
5#	186		147
Phox2b shRNA
7#	37		58
8#	110		52
9#	113		2
10#	143		35
11#	219		174
