# Supplementary material for: Knockdown of PHOX2B in the retrotrapezoid nucleus reduces the central CO2 chemoreflex in rats
Source: eLife. 2024 May 10;13:RP94653. doi: 10.7554/eLife.94653 (PMC11087052; doi:10.7554/eLife.94653)
Supplement: Figure 2—source data 1. [file elife-94653-fig2-data1.xlsx]

## Sheet: Fig. 2
Cell Counts
naïve	NMB+/PHOX2B+		NMB+/PHOX2B-		TOTAL
#1	268		70		338
#2	296		44		340
#3	279		61		340
#4	260		72		332
NT-shRNA
#1	230		63		293
#2	245		46		291
#3	222		52		274
#4	232		54		286
PHOX2B-shRNA
#1	140		82		222
#2	157		66		223
#3	135		72		207
#4	161		62		223
distribution NMB+/PHOX2B-
distance from 7Mn		naïve				NT-shRNA				PHOX2B-shRNA
		#1	#2	#3	#4	#1	#2	#3	#4	#1	#2	#3	#4
-420		11	12	10	8	8	5	10	9	2	5	10	4
-210		94	82	97	83	69	75	73	70	49	55	43	60
0		64	89	81	70	54	65	65	66	34	45	35	42
210		47	59	45	55	47	51	40	50	27	26	20	31
420		27	24	20	17	27	18	16	18	17	11	6	10
630		10	10	5	10	10	11	5	10	5	9	6	5
840		10	12	14	8	10	10	5	5	4	3	7	4
1050		5	8	7	9	5	10	8	4	2	3	8	5
distribution NMB+/PHOX2B+
distance from 7Mn		naïve				NT-shRNA				PHOX2B-shRNA
		#1	#2	#3	#4	#1	#2	#3	#4	#1	#2	#3	#4
-420		20	6	12	10	14	13	8	9	15	8	12	12
-210		23	9	21	17	25	11	12	11	30	25	22	22
0		14	16	19	20	15	10	16	17	25	20	20	19
210		6	9	7	18	3	5	6	7	10	9	13	7
420		5	4	2	7	5	2	7	7	2	4	5	2
630		2	0	0	0	1	1	3	2	0	0	0	0
840		0	0	0	0	0	4	0	1	0	0	0	0
1050		0	0	0	0	0	0	0	0	0	0	0	0
