# Supplementary material for: Knockdown of PHOX2B in the retrotrapezoid nucleus reduces the central CO2 chemoreflex in rats
Source: eLife. 2024 May 10;13:RP94653. doi: 10.7554/eLife.94653 (PMC11087052; doi:10.7554/eLife.94653)
Supplement: Figure 4—source data 1. [file elife-94653-fig4-data1.xlsx]

## Sheet: Fig. 4
		* replicate animals in columns
frequency
	Baseline
	NT-shRNA										Phox2b shRNA						Naive
	#8	#9	#10	#11	#12	#13	#14	#15	#16	#17	#12	#13	#14	#15	#16	#17	#5	#6	#7	#8	#9	#10	#11	#12
Air	119.8	110.7	95.16	106.88	114.38	104.94	108.5	112.03	111.84	117.05	113.58	122.96	114.27	101.93	103.21	96.09	108.8	99.45	102.46	112.31	112.7	100.55	97.66	104.33
5% CO2	161.81	139.04	141.36	182.8	157.59	167.34	162.09	156.72	153.26	149.79	147.39	156.27	162.62	170.46	166.4	168.38	168.05	187.25	184.13	148.1	167.36	146.5	141.43	150.6
7.2% CO2	140.08	152.07	177.14	200.91	179.17	172.77	169.77	169.39	166.12	156.9	166.95	160.04	177.29	172.2	173.69	172.56	174.14	191.33	178.92	157.08	167.27	170.1	149.84	164.7
	NT-shRNA (Post 4 Weeks)
	#8	#9	#10	#11	#12	#13	#14	#15	#16	#17
Air	93.9667	86.6491	97.042	103.152	108.294	94.7145	90.8613	98.1512	102.444	103.425
5% C02	143.127	135.124	140.397	132.486	164.1	150.192	140.928	150.708	127.238	141.917
7.2% CO2	142.689	137.059	147.363	139.737	194.497	150.935	155.324	167.793	158.857	153.228
	Phox2b shRNA (Post 4 Weeks)
											#12	#13	#14	#15	#16	#17
											90.0189	95.8487	99.5483	117.568	115.516	96.3551
Air											129.983	144.312	154.317	137.564	154.731	131.742
5% C02											135.331	155.814	156.41	142.352	163.095	148.965
7.2% CO2
	Naive (Post, 4 Weeks)
																	#5	#6	#7	#8	#9	#10	#11	#12
Air																	101.25	104.57	104.76	96.78	94.74	86.49	81.97	88.98
5% C02																	119.37	151.68	145.67	136.88	142.31	128.08	126.08	124.85
7.2% CO2																	143.74	162.38	151.25	135.32	168.49	142.96	138.91	146.85
Vt
	Baseline
	NT-shRNA										Phox2b shRNA						Naive
	#8	#9	#10	#11	#12	#13	#14	#15	#16	#17	#12	#13	#14	#15	#16	#17	#5	#6	#7	#8	#9	#10	#11	#12
Air	5.11	4.93	5.79	6.13	5.03	5.55	5.85	5.64	4.53	5.16	5.57	5.34	5.49	6.78	6.74	6.62	6.33	5.48	6.16	5.46	5.12	6.11	6.65	5.9
5% CO2	8.82	6.92	7.47	8.28	7	7.76	7.61	8.22	7.51	6.65	6.83	6.91	6.08	8.63	9.2	8.31	8.34	7.04	7.41	7.83	6.77	7.97	9.6	7.02
7% CO2	12.28	9.23	8.09	9.9	8.43	9.03	9.45	10.55	8.81	8.64	7.8	10.28	9.4	11.07	12.24	11.32	9.83	7.55	8.54	9.4	8.4	8.44	10.77	10.48
	NT-shRNA (Post, 4 Weeks)
	#8	#9	#10	#11	#12	#13	#14	#15	#16	#17
Air	5.8	5.48	4.86	5.86549	5.78	5.92317	4.85	5.98139	5.15	5.85
5% CO2	7.41	9.04	6.85	8.79	8.34	8.24	7.48	7.95	8.28	8.29
7% CO2	8.47	10	8.28	10.43	9.28	8.01	8.74	9.03	10.36	9.89
	Phox2b shRNA (Post, 4 Weeks)
											#12	#13	#14	#15	#16	#17
Air											4.74	5.1	5.25	4.92	5.29	4.83
5% CO2											7.14	6.35	5.73	7.29	7.25	6.46
7% CO2											7.85	7.52	6.49	6.42	6.77	7.61
	Naive (Post, 4 Weeks)
																	#5	#6	#7	#8	#9	#10	#11	#12
Air																	4.91	4.26	4.56	5.59	5.8	5.75	5.77	4.65
5% CO2																	6.82	6.53	8.8	7.64	7.7	8.11	8.84	9.08
7% CO2																	8.97	7.24	11.18	8.72	9.78	10.14	11.25	9.41
VE_ALLO
	Baseline
	NT-shRNA										Phox2b shRNA						Naive
	#8	#9	#10	#11	#12	#13	#14	#15	#16	#17	#12	#13	#14	#15	#16	#17	#5	#6	#7	#8	#9	#10	#11	#12
Air	31.15	28.74	28.93	36.28	31.28	32.79	35.8	36.25	28.76	35.34	39.65	41.37	33.4	33.2	32.64	30.66	33.81	28.48	33.78	38.76	32.52	34.03	34.21	32.75
5% CO2	72.73	50.64	55.48	84.41	60.02	73.05	69.59	73.97	65.39	58.27	63.04	68.07	52.64	70.65	71.85	67.54	68.83	68.86	72.91	73.31	63.33	64.71	71.47	57.25
7.2% CO2	88.03	78.71	75.24	110.98	82.17	87.77	90.54	102.55	83.16	79.36	81.66	103.8	88.81	91.54	99.75	94.22	84.06	75.45	81.72	93.38	79	79.15	84.86	93
	NT-shRNA (Post 4 Weeks)
	#8	#9	#10	#11	#12	#13	#14	#15	#16	#17
Air	34.82	31.58	29.57	38.73	40.54	37.65	35.42	39.2681	35.67	43.25
5% CO2	67.76	81.24	60.28	74.5	88.66	83.09	70.16	80.1	71.16	84.1
7.2% CO2	77.19	91.21	76.45	93.26	116.87	81.13	90.37	101.32	90.15	108.32
	Phox2b shRNA (Post 4 Weeks)
											#12	#13	#14	#15	#16	#17
Air											31.25	34.74	37.89	40.2	41.74	31.3
5% CO2											67.91	65.13	64.11	69.76	76.71	57.22
7.2% CO2											77.77	83.29	73.51	63.59	84.27	76.28
	Naive (Post, 4Weeks)
																	#5	#6	#7	#8	#9	#10	#11	#12
Air																	32.39	31.54	35.18	38.61	36.88	31.58	28.79	29.85
5% CO2																	53.08	70.14	94.39	74.65	73.52	65.89	67.83	81.8
7.2% CO2																	84.02	83.24	124.55	84.26	110.58	91.96	95.14	99.76
VE/VO2_ALLO
	Baseline
	NT-shRNA										Phox2b shRNA						Naive
	#8	#9	#10	#11	#12	#13	#14	#15	#16	#17	#12	#13	#14	#15	#16	#17	#5	#6	#7	#8	#9	#10	#11	#12
Air	2.16	2.69	2.82	2.69	2.3	2.81	3.07	2.61	2.25	2.53	2.7	3.2	2.84	2.3	3.37	2.65	2.61	2.64	2.77	2.47	2.24	2.8	2.11	2.51
5% CO2	5.53	5.5	5.44	4.76	4.04	5.62	5.11	5.21	5.49	5.53	5.98	3.66	6.21	4.81	4.77	5.38	4.92	5	5.27	5.43	5.65	3.82	4.82	5.31
7.2% CO2	7.06	6.45	7.56	5.87	7.12	7.96	9.88	8.84	8.08	7.78	8.1	6.33	6.31	8.28	7.34	7.65	7.5	7.28	7.1	11.1	6.77	7.95	6.68	90.1
Air	NT-shRNA Post 4 weeks
	#8	#9	#10	#11	#12	#13	#14	#15	#16	#17
5% CO2	5.76	6.3	4.65	6.29	6.44	5.82	5.43	5.9	5.34	5.81
7.2% CO2	6.13	7.23	7.46	8.83	9.56	6.02	8.11	8.41	8.18	9.38
	Phox2b shRNA Post 4 weeks
											#12	#13	#14	#15	#16	#17
Air											2.19	2.6	3	3.12	2.6	2.28
5% CO2											4.69	4.66	4.7	5.16	5.43	4.43
7.2% CO2											6.72	6.17	6.04	4.67	6.88	5.88
	Naive Post 4 weeks
																	#5	#6	#7	#8	#9	#10	#11	#12
Air																	2.98	2.28	2.76	2.78	2.91	2.52	2.21	2.26
5% CO2																	4.07	5.07	5.25	5.49	5.43	5.45	5.96	6.8
7.2% CO2																	8.57	7.5	7.78	6.41	7.16	8.24	6.82	9.98
HCVR
	Baseline
	NT-shRNA										Phox2b shRNA						Naive
	#8	#9	#10	#11	#12	#13	#14	#15	#16	#17	#12	#13	#14	#15	#16	#17	#5	#6	#7	#8	#9	#10	#11	#12
5% CO2	41.58	21.9	26.56	48.13	28.74	40.27	33.79	37.72	36.63	22.93	23.39	26.69	19.24	37.46	39.21	36.87	35.02	40.38	39.13	34.55	30.81	30.68	37.26	24.5
7.2% CO2	56.88	49.97	46.31	74.7	50.88	54.98	54.74	66.3	54.39	44.02	42	62.43	55.41	58.34	67.11	63.56	50.25	46.97	47.94	54.62	46.48	45.12	50.65	60.25
	NT-shRNA Post 4 weeks
	#8	#9	#10	#11	#12	#13	#14	#15	#16	#17
5% CO2	32.94	49.65	30.71	35.78	48.11	45.44	34.75	40.83	35.49	40.86
7.2% CO2	42.37	59.62	46.88	54.53	76.33	43.48	54.96	62.05	54.48	65.08
	Phox2b-shRNA Post 4 weeks
											#12	#13	#14	#15	#16	#17
5% CO2											36.65	30.39	26.21	29.56	34.97	25.92
7.2% CO2											46.52	48.55	35.61	23.39	42.52	44.98
	Naive Post 4 weeks
																	#5	#6	#7	#8	#9	#10	#11	#12
5% CO2																	20.69	38.6	59.21	36.04	36.64	34.31	39.04	51.95
7.2% CO2																	51.63	51.7	89.37	45.65	73.7	60.38	66.35	69.91
HCVR 7.2% CO2
naïve	Baseline	2-weeks	4-weeks
#5	50.25	51.63	54.62
#6	46.97	49	51.7
#7	47.94	53.48	89.37
#8	54.62	63.64	45.65
#9	46.48	72.22	73.7
#10	45.12	38.07	60.38
#11	50.65	37.88	66.35
#12	60.25	43.02	69.91
NT-shRNA				Baseline	2-weeks	4-weeks
# 8				56.88	59.97	42.37
# 9				49.97	38.95	59.62
# 10				46.31	39.03	46.88
# 11				74.7	62.42	54.53
# 12				50.88	41.9	76.33
# 13				54.98	77.57	43.48
# 14				54.74	58.84	54.96
# 15				66.3	46	62.05
# 16				54.39	54.92	54.48
# 17				44.02	44.31	65.08
							Baseline	2-weeks	4-weeks
PHOX2B-shRNA							42	55.2	46.52
#12							62.43	71.47	48.55
#13							55.41	51.75	35.61
#14							58.34	51.16	23.39
#15							67.11	48.55	42.52
#16							63.56	63.61	44.98
#17
