# Supplementary material for: Knockdown of PHOX2B in the retrotrapezoid nucleus reduces the central CO2 chemoreflex in rats
Source: eLife. 2024 May 10;13:RP94653. doi: 10.7554/eLife.94653 (PMC11087052; doi:10.7554/eLife.94653)
Supplement: Figure 5—source data 1. [file elife-94653-fig5-data1.xlsx]

## Sheet: Fig. 5
TH+/PHOX2B+
distance from 7Mn		NAIVE				NT-shRNA										PHOX2B-shRNA
		#6	#10	#11	#12	#8	#9	#10	#11	#12	#13	#14	#15	#16	#17	#12	#13	#14	#15	#16	#17
	-1200	22	19	25	15	19	5	24	26	17	28	5	17	24	22	33	22	16	31	27	28
	-960	26	30	22	25	32	29	34	24	30	31	24	20	36	55	15	25	20	30	29	31
	-720	32	36	28	35	34	40	38	29	24	45	32	38	31	35	40	36	32	41	29	45
	-480	55	60	57	50	42	68	71	64	69	73	58	61	63	72	40	50	40	52	56	70
	-240	72	76	69	65	64	78	62	59	81	79	61	59	75	63	65	72	79	36	60	79
	0	69	72	48	61	59	52	69	74	72	80	74	64	58	62	60	58	69	59	33	70
	240	64	60	58	69	64	49	59	51	68	42	31	71	53	64	49	52	45	59	57	42
	480	32	59	49	53	42	49	57	56	59	68	55	46	51	48	46	58	65	53	49	68
Nmb CTCF RTN/NTS
distance from 7Mn		NAIVE				NT-shRNA										PHOX2B-shRNA
		#6	#10	#11	#12	#8	#9	#10	#11	#12	#13	#14	#15	#16	#17	#12	#13	#14	#15	#16	#17
	-210	0.808151	1.15695	1.32956	0.952017	1.21732	0.938733	0.804447	1.04003	1.11851	1.02195	0.827956	0.938733	1.06402	1.16982	0.808151	1.02717	1.31658	1.0818	0.957743	1.10625
	0	0.976458	0.929587	0.918578	1.27618	0.918578	1.11249	1.07488	0.975677	0.975677	1.10546	0.84589	1.26502	1.24303	1.09099	1.1597	1.28442	1.07556	0.786624	1.10771	0.65216
	210	0.872072	0.941502	1.03546	1.12839	1.07973	1.30327	0.888625	0.89529	1.19722	0.616741	0.747371	0.97215	1.02643	1.09936	0.83979	0.83979	1.30702	1.22915	0.969578	0.969578
	420	1.00186	0.941502	1.03546	1.12839	1.07973	1.30327	0.758837	0.89529	1.19722	0.616741	0.747371	0.97215	1.02643	1.09936	1.11851	1.17349	0.758837	0.89529	1.19722	0.746528
HCVR vs Nmb+/PHOX2B+										HCVR vs Nmb+/PHOX2B-
NMB+/PHOX2b+		Naive		NT-shRNA		Phox2b shRNA			NMB+/PHOX2b-		Naive		NT-shRNA		Phox2b shRNA
	257	51.6279	#6							80	51.6279	#6
	285	60.3785	#10							59	60.3785	#10
	303	66.3453	#11							62	66.3453	#11
	293	69.909	#12							52	69.909	#12
	189			42.3677	#8	#8				85			42.3677	#8
	243			59.6221	#9	#9				55			59.6221	#9
	201			46.8762	#10	#10				42			46.8762	#10
	273			54.5287	#11	#11				65			54.5287	#11
	287			76.3303	#12	#12				42			76.3303	#12
	117			43.4782	#13	#13				64			43.4782	#13
	247			54.9578	#14	#14				42			54.9578	#14
	268			62.0521	#15	#15				65			62.0521	#15
	254			54.4821	#16	#16				49			54.4821	#16
	308			65.076	#17	#17				53			65.076	#17
	133					46.5222	#12			171					46.5222	#12
	123					48.5516	#13			126					48.5516	#13
	89					35.6146	#14			182					35.6146	#14
	61					23.3867	#15			160					23.3867	#15
	82					42.5234	#16			130					42.5234	#16
	75					44.9834	#17			165					44.9834	#17
