# Supplementary material for: Knockdown of PHOX2B in the retrotrapezoid nucleus reduces the central CO2 chemoreflex in rats
Source: eLife. 2024 May 10;13:RP94653. doi: 10.7554/eLife.94653 (PMC11087052; doi:10.7554/eLife.94653)
Supplement: Figure 6—source data 1. [file elife-94653-fig6-data1.xlsx]

## Sheet: Fig. 6
Gpr4 CTCF
distance from 7Mn		NAIVE				NT-shRNA										PHOX2B-shRNA
		#6	#10	#11	#12	#8	#9	#10	#11	#12	#13	#14	#15	#16	#17	#12	#13	#14	#15	#16	#17
	-210	696554400	2347586000	3012170000	5826144000	613543500	718252600	3654466000	758362600	4228076000	4069913000	6322484000	849785700	518252600	8654466000	655049000	1932919000	2333318000	1192253000	4275280000	959849300
	0	551866800	4008043000	501956800	2784175000	1674199000	6290605000	314222800	454236800	360909700	490023200	561984300	6261527000	929604900	414222800	1113033000	2168824000	308089800	1469206000	361447000	1625775000
	210	513003100	2884554000	5226103000	2762712000	2394490000	4594364000	8616140000	921246100	475437400	499634400	3894118000	2296979000	459436400	861614000	1453747000	1671995000	1543859000	1841979000	2184778000	1398307000
	420	459436400	5434728000	451500000	2697711000	2030485000	1385702000	641487900	6427257000	258552100	1236838000	4175500000	2616984000	138570200	641487900	1244961000	1286649000	446494000	1670218000	2217026000	1370334000
Gpr4 CTCF PHOX2B -shRNA 4 weeks
distance from 7Mn		Nmb+/Phox2b+						Nmb+/Phox2b-
		#12	#13	#14	#15	#16	#17	#12	#13	#14	#15	#16	#17
	-210	696554400	3347586000	3012170000	1826144000	6322484000	849785700	613543500	518252600	1654466000	558362600	2228076000	1069913000
	0	551866800	4008043000	501956800	2784175000	561984300	2261527000	1674199000	329604900	114222800	154236800	160909700	990023200
	210	513003100	2884554000	2226103000	2762712000	3894118000	2296979000	2394490000	459436400	861614000	921246100	475437400	499634400
	420	459436400	2434728000	251500000	2697711000	4175500000	2616984000	2030485000	138570200	641487900	642725700	258552100	123683800
Task2 CTCF
distance from 7Mn		NAIVE				NT-shRNA										PHOX2B-shRNA
		#6	#10	#11	#12	#8	#9	#10	#11	#12	#13	#14	#15	#16	#17	#12	#13	#14	#15	#16	#17
	-210	2784175000	4008043000	501956800	551866800	2261527000	1619843000	1542368000	3296049000	1142228000	1674199000	990023200	1609097000	3261527000	4619843000	1469206000	2168824000	308089800	1113033000	1625775000	361447000
	0	2762712000	4884554000	2226103000	513003100	2296979000	3894118000	1212461000	959436400	2616140000	2394490000	2996344000	475437400	2296979000	3894118000	1841979000	1671995000	1543859000	1453747000	1398307000	2184778000
	210	4697711000	2434728000	551500000	359436400	2616984000	4175500000	642725700	138570200	641487900	2030485000	123683800	258552100	2616984000	4175500000	1670218000	1286649000	446494000	1244961000	1370334000	2217026000
	420	3826144000	3347586000	2012170000	296554400	2497857000	2322484000	958362600	3182526000	1654466000	2135435000	1069913000	2228076000	549785700	2322484000	2192253000	1332919000	2833318000	355049000	809849300	2275280000
Task2 CTCF PHOX2B -shRNA 4 weeks
distance from 7Mn		Nmb+/Phox2b+						Nmb+/Phox2b-
		#12	#13	#14	#15	#16	#17	#12	#13	#14	#15	#16	#17
	-210	2784175000	4008043000	501956800	551866800	2261527000	561984300	154236800	329604900	114222800	1674199000	990023200	160909700
	0	2762712000	2884554000	2226103000	513003100	2296979000	3894118000	921246100	459436400	861614000	2394490000	499634400	475437400
	210	2697711000	2434728000	251500000	459436400	2616984000	4175500000	642725700	138570200	641487900	2030485000	123683800	258552100
	420	3826144000	2347586000	4012170000	496554400	549785700	2322484000	558362600	318252600	1654466000	213543500	1069913000	2228076000
